# Supplementary material for: Preparation of mono-dispersed titanium oxide–octadecylamine hybrid spherical particles in the submicron size range
Source: Royal Society of Chemistry journal article supplement (doi:10.1039/c1ra00748c), 2011-12-08
Supplement: c1ra00748c.pdf [file c1ra00748c.pdf]

## Preparation of mono-dispersed titanium oxide-octadecylamine hybrid spherical particles in the submicron size range

Kota Shiba,<sup>a</sup> Ken Onaka<sup>b</sup> and Makoto Ogawa\*<sup>a,b</sup>

<sup>a</sup> Graduate School of Creative Science and Engineering, Waseda University, 1-6-1 Nishiwaseda, Shinjuku-ku, Tokyo 169-8050, Japan.

<sup>b</sup> Department of Earth Sciences, Waseda University, 1-6-1 Nishiwaseda, Shinjuku-ku, Tokyo 169-8050, Japan.

Fax: +81-3-3207-4950; Tel: +81-3-5286-1511; E-mail: [waseda.ogawa@gmail.com](mailto:waseda.ogawa@gmail.com)

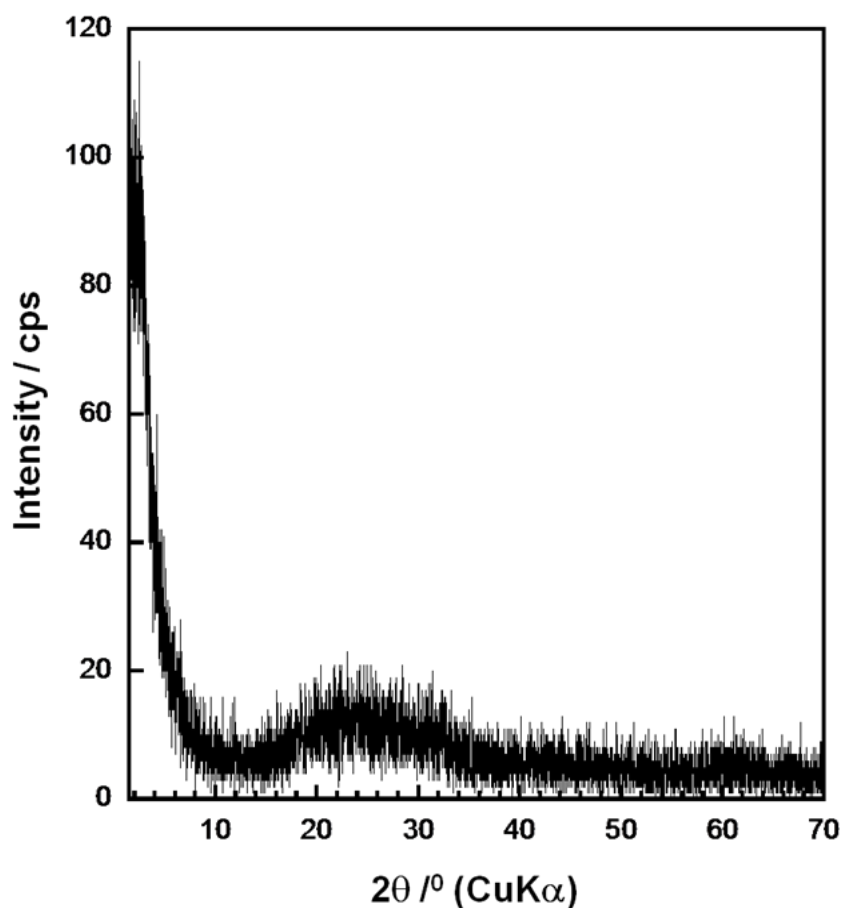

Figure S1. XRD pattern of as-synthesized titanium oxide-ODA hybrid particles.
